# Supplementary material
Source: publisher site journal article supplement (https://www.dovepress.com/article/535298)
Supplement: Supplementary file 1 [file 535298%20Revised%20Appendix.docx]

**Appendix 1 – Semi-structured interview guide**

| Interview Guide |
| --- |
| 1. Introduction 2. Tell us about your **current practice** on tapering opioids for chronic pain patients?    1. What are the circumstances that raise the need to taper?    2. Who is an ideal candidate for tapering opioids?    3. Are they one-off consultations or do you support them throughout a period?    4. How do you initiate those conversations?    5. What are your concerns about **tapering** and not **tapering**?    6. How do you mange a patient switching to you who has been on long-term opioids for chronic non-cancer pain? (If GP) 3. What **resources/evidence-based guidelines** have you used in aiding opioid tapering conversations for people with chronic pain?    1. How have you found the resources?    2. What were helpful/unhelpful?    3. How do you use them in your practice? 4. Has there been a time when you **successfully tapered** opioids with your chronic pain patient? Can you describe what **helped** you in this process? What does **successful opioid tapering** would look like? are there any factors which make it easier? 5. Can you describe the **challenges** you face in tapering opioids with your chronic pain patients? Have you noticed any **harms** of opioid tapering with your patients? What other **barriers** do you envisage that you may not have personally experienced in this process? 6. How **personally stressful** is it for you to initiate or manage opioid tapering?    1. How does this aspect of your work influence your **wellbeing**, career or work decisions? 7. How have you found the **integration** between primary and tertiary care services in facilitating opioid tapering?    1. How do you co-ordinate with the GP/Pain specialist in this process?    2. Whose responsibility is to co-ordinate this process? 8. We know there are **inequities** in chronic pain prevalence and opioid dispensing for Māori. What is your approach in tapering opioids for Māori patients? Are there any specific barriers/facilitators in your experience of tapering opioids with Māori patients? 9. What **changes** would you like to see to facilitate opioid tapering for patients with chronic pain?   Probe questions   1. That is interesting, could you elaborate further? 2. Can you provide an example? 3. Could you tell me more? 4. Is there anything else? 5. I don’t understand, could you explain this again? |

**Table 1 – Themes & Subthemes**

| Theme 1 – Understanding the person and context | Example quotes |
| --- | --- |
| 1.1 Addressing patient fears with trust. | “Often, there's a lot of fear, even if they're not in a lot of pain. They fear that their pain will come back, and they remember their pain being this monster that is ruining their lives and ruining the things they do. Again, there's that, why don't they taper? They don't want to, because they don't want to run the risk of going back to where they were” |
| 1.2 Person-centred tapering practices | “The rule of thumbs: are [to] reduce one medication at a time or for an opiate, one drug at a time. If we reduce the long acting or the short, I really don't care. Reducing one medication at a time; number 2, reduce small amounts of 10 to 20%, usually, I would recommend at a time - or the smallest tablet - sometimes really there is no 10% … A lot of patients want to do an opiate taper, and they say, ‘ I'm going to attempt my opiate taper during my holiday.’ I tell them, ‘Oh stuff it. Don't do it. Your holiday is your holiday. Enjoy your holiday. That's what holidays are for. You do your opiate tapering in the background during your normal day. Whatever you're doing, just do it on your normal days. Those are my keys for opioid taper.” |
|  | “my own approach is that I would never try arm twisting because it's not going to work. I don't think that we can ethically try to force somebody off and say, ‘You're just going to go through withdrawal, sorry.” |
|  | “I think that conversation is what's really helpful. It’s like those things that they sell on TV, those 30-day money back guarantee things, because you know that if something goes wrong, you can always go back to how things were. I find that really helpful because then they are like, ‘Okay, that's good.’” |
| 1.3 Appealing to patient’s intrinsic motivations. | “I think what helps is good education. First, when people are started on opioids, they get promised, ‘Your pain requires strong opioids now.’ In their mindset, it's all about: I do need these drugs to get better or be able to function. So, you have to actually introduce a different thinking about their medication. I often say to patients, ‘Look, if opioids would be so helpful for your condition, you would not sit in front of me right now, but you would be out and about and enjoy your life.’ The fact that you have a consultation with a tertiary pain service and a pain medicine specialist is already telling you something – it’s treatment failure.” |
|  | “I’ve found, especially with Māori patients, they put a lot of importance and emphasis on their whānau (family and significant others) and their wellbeing, almost to a point that, actually, their family is more important than them. In Asian families I find that's also quite true. … It's especially useful as a GP because often I know the whole family, so I can talk about specific things. It’s not a general thing, like, ‘Oh well you can go play with your grandkids’ or something. I could say, ‘Hey, look, your grandson has just been diagnosed with ADHD. He needs a lot more attention, and I know that you are really connected to your grandson. Maybe tapering this down might really help you spend more time with him.’ Being really specific is quite good. That's the beauty of a GP.” |
| Theme 2 – Cumulative & intersectional disadvantages. |  |
| 2.1 Rurality and access barriers to tertiary pain services | "I think that's where it comes into pain, the difference that I see in regards to Māori and Pasifika who have less access. I suppose they don't have the money to afford the alternative treatments that often, I think, are quite useful ... like acupuncture or pilates or movement-based therapies." |
| 2.2 Intersectional disadvantages contributing to health inequities | “… coming back on the poverty: if I, for example, had that initial consult with that person and I said, ‘Let’s sort out all the stuff. Let's go through your agenda. Let's book an appointment for two weeks’ time to sort out your tapering.’ -  they could come back and say, ‘Well, I'm sorry, doc, but I actually don't have that money to come and see you in two weeks’ time to talk about it... we've got free contraception and sexual health for Māori patients... We have a shared care mental health pathway… We have funding for Covid... So, if we had one for opioid tapering and we said, ‘Well, look, this consult will be funded because what we're going to talk about is opioid tapering,’ – then that would reduce one of the barriers for the patients.” |
|  | “Compare that to an under-serviced Māori population where you've got one GP who's having to look after 4,000 patients: a lot of them are going to be high needs, with lots of comorbidities, and a patient who is opioid-dependent is going to present to that GP saying, ‘I just want a repeat prescription of this - I'll be out of your hair.’ ... It's a two-minute consult and that busy GP can then get on and look after the dying patient with renal failure, heart failure, and the other issues, the mental health issues and the social issues which are going on with that person.  I hate to say this, but they’re very easy to overlook, in other words, and the more busy the doctor is, the easier it is to overlook them.” |
| Theme 3 – Confrontation, ethical conflict, and clinician distress. |  |
| 3.1 Confrontational encounters and clinician distress | “Then they'll come back complaining that they get withdrawal. They're back up at that dose or with more or couldn't do the things that they want to do and it's like, I've failed again. The only way I can continue to practise is to just block that out." |
|  | “He came with a gun, opened the door and pointed it at my colleague and said, ‘This is what’s coming if you're going to do anything about my methadone.’ We found out it was a toy gun; it wasn't actually a real gun. But my colleague thought his days are numbered and he got quite traumatised by that.” |
| 3.2 Ethical and moral dilemmas | ‘Hey, look, my child really wanted to go to the school camp, we didn't have a jacket for her. We didn't have the stuff we needed and we didn't have the money to pay for school camp. She said, ‘Yeah, I went and I sold my medication so that she could do the normal things that everybody else in her class does.’ She says, ‘I'm so tired of my kids feeling poor all the time, feeling like they can’t participate in society, feeling like they can't go to … because I don't have $30 to pay for the team; that they can't go on the school camp because I don't have $100 to spend on the jacket and the fees and everything like that.’ She said, ‘It breaks my heart that my daughter has to go in and everybody knows that she can't do these things just because she's poor.’ And she said, ‘Yes, I did. I went and I sold it. I got the money, and I bought that stuff.’ My child went to the school camp, and she said, ‘I am not ashamed of it.’ |
| 3.3 Resource constraints | “Our model of healthcare has changed, especially in the GP world. A 10-minute consultation …no longer a long-term relationship with the patients. Healthcare has changed to look for efficiency.” |
|  | “To be fair, in the long run, I think it'll be more cost-efficient than seeing specialists over and over and all these opioids and then some of these opioids going on the black market and people selling them and all those social effects as well. It'll be way cheaper to fund a couple of sessions with the GP to do an opioid tapering. Purely from a financial point of view, I think that would make sense too.” |
| Theme 4 - Mahi Tahi – Working together. |  |
| 4.1 Better co-ordination and collaboration between primary and tertiary care services | “… the problem is a lot of our patients have been put on the opioid regime by a specialist. Often with the patients, I find that they are more comfortable if, even for a once-off, they see a specialist and the specialist says, ‘Yes, I do think we should try tapering it down. I will write some advice and send it to your GP and then your GP can take over from here.’ … I find that often goes a lot smoother than us trying to initiate it, because often they'll be like, ‘Well, the specialist started me on it. You're not the specialist. The specialist thought I needed it.’ Often, because they think that the specialist is the one that started it, and they're specialised in that field, pain or whatever, that they should at least have a go ahead from them to say, ‘We should do this.’  Often, that is really helpful.” |
|  | “It’s been very siloed off in her case. She has actually had a private psychologist on board, but again, it's like everyone's not talking to each other. I think that's the benefit of that MDT approach, where you could have the psychiatry/psychologist support also with the pain medication expertise and just taking everything all together. It is all so intertwined ...” |
